# Supplementary material for: JMJD6 Shapes a Pro-tumor Microenvironment via ANXA1-Dependent Macrophage Polarization in Breast Cancer
Source: PubMed Central journal article supplement — Mol Cancer Res. 2023 Mar 3;21(6):614–27. doi: 10.1158/1541-7786.MCR-22-0370 (PMC10233359; doi:10.1158/1541-7786.mcr-22-0370), 2023-03-03

A

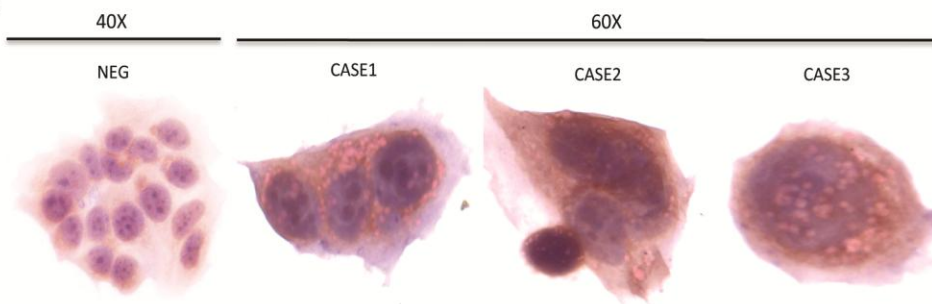

C

| Pathway name                                                                                                        | Entities    |          |          |          | Reactions   |          |
|---------------------------------------------------------------------------------------------------------------------|-------------|----------|----------|----------|-------------|----------|
|                                                                                                                     | found       | ratio    | p-value  | FDR*     | found       | ratio    |
| Metabolism                                                                                                          | 126 / 3,646 | 0.255    | 1.11e-16 | 9.90e-14 | 246 / 2,260 | 0.166    |
| The citric acid (TCA) cycle and respiratory electron transport                                                      | 26 / 238    | 0.017    | 2.76e-13 | 1.23e-10 | 35 / 67     | 0.005    |
| PPARA activates gene expression                                                                                     | 20 / 175    | 0.012    | 7.90e-11 | 2.14e-08 | 10 / 41     | 0.003    |
| Regulation of lipid metabolism by PPARalpha                                                                         | 20 / 177    | 0.012    | 9.61e-11 | 2.14e-08 | 10 / 44     | 0.003    |
| Metabolism of lipids                                                                                                | 60 / 1,444  | 0.101    | 2.75e-10 | 4.89e-08 | 113 / 954   | 0.07     |
| Respiratory electron transport, ATP synthesis by chemiosmotic coupling, and heat production by uncoupling proteins. | 17 / 153    | 0.011    | 3.26e-09 | 4.82e-07 | 21 / 31     | 0.002    |
| Respiratory electron transport                                                                                      | 15 / 118    | 0.008    | 4.83e-09 | 6.13e-07 | 14 / 19     | 0.001    |
| Transcriptional regulation of white adipocyte differentiation                                                       | 14 / 109    | 0.008    | 1.40e-08 | 1.48e-06 | 14 / 18     | 0.001    |
| Protein localization                                                                                                | 17 / 170    | 0.012    | 1.50e-08 | 1.48e-06 | 34 / 53     | 0.004    |
| Citric acid cycle (TCA cycle)                                                                                       | 9 / 50      | 0.004    | 3.62e-07 | 3.22e-05 | 10 / 17     | 0.001    |
| Peroxisomal protein import                                                                                          | 10 / 67     | 0.005    | 4.41e-07 | 3.57e-05 | 22 / 26     | 0.002    |
| Pyruvate metabolism and Citric Acid (TCA) cycle                                                                     | 11 / 100    | 0.007    | 2.23e-06 | 1.65e-04 | 14 / 36     | 0.003    |
| FOXO-mediated transcription                                                                                         | 11 / 110    | 0.008    | 5.46e-06 | 3.71e-04 | 11 / 85     | 0.006    |
| Fatty acid metabolism                                                                                               | 22 / 431    | 0.03     | 1.06e-05 | 6.68e-04 | 55 / 217    | 0.016    |
| Mitochondrial Fatty Acid Beta-Oxidation                                                                             | 9 / 105     | 0.007    | 1.25e-04 | 0.007    | 32 / 47     | 0.003    |
| Mitochondrial protein import                                                                                        | 7 / 69      | 0.005    | 2.60e-04 | 0.014    | 9 / 14      | 0.001    |
| Beta oxidation of hexanoyl-CoA to butanoyl-CoA                                                                      | 4 / 18      | 0.001    | 3.24e-04 | 0.015    | 4 / 4       | 2.95e-04 |
| Beta oxidation of lauroyl-CoA to decanoyl-CoA-CoA                                                                   | 4 / 18      | 0.001    | 3.24e-04 | 0.015    | 4 / 4       | 2.95e-04 |
| Beta oxidation of octanoyl-CoA to hexanoyl-CoA                                                                      | 4 / 18      | 0.001    | 3.24e-04 | 0.015    | 4 / 4       | 2.95e-04 |
| mitochondrial fatty acid beta-oxidation of saturated fatty acids                                                    | 6 / 53      | 0.004    | 4.04e-04 | 0.018    | 26 / 29     | 0.002    |
| TYSND1 cleaves peroxisomal proteins                                                                                 | 3 / 8       | 5.61e-04 | 4.18e-04 | 0.018    | 3 / 7       | 5.16e-04 |
| Beta oxidation of decanoyl-CoA to octanoyl-CoA-CoA                                                                  | 4 / 21      | 0.001    | 5.75e-04 | 0.022    | 4 / 5       | 3.68e-04 |
| mitochondrial fatty acid beta-oxidation of unsaturated fatty acids                                                  | 4 / 21      | 0.001    | 5.75e-04 | 0.022    | 4 / 6       | 4.42e-04 |

B

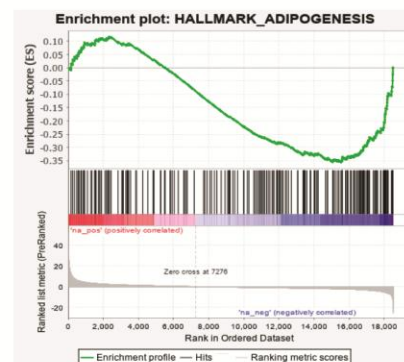

Supplement: mcr-22-0370_figure_s2_suppsf2.pdf [file mcr-22-0370_figure_s2_suppsf2.pdf]
