# Supplementary figures and images for: JMJD6 Shapes a Pro-tumor Microenvironment via ANXA1-Dependent Macrophage Polarization in Breast Cancer
Source: PubMed Central journal article supplement — Mol Cancer Res. 2023 Mar 3;21(6):614–27. doi: 10.1158/1541-7786.MCR-22-0370 (PMC10233359; doi:10.1158/1541-7786.mcr-22-0370), 2023-03-03

A

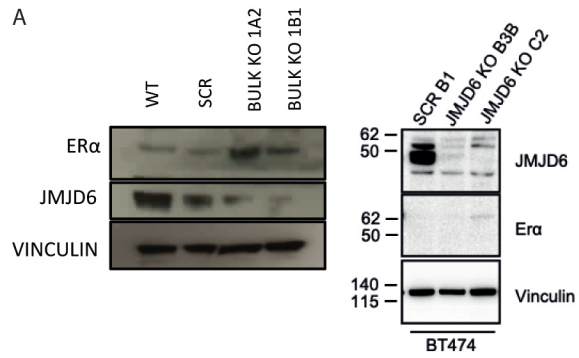

B

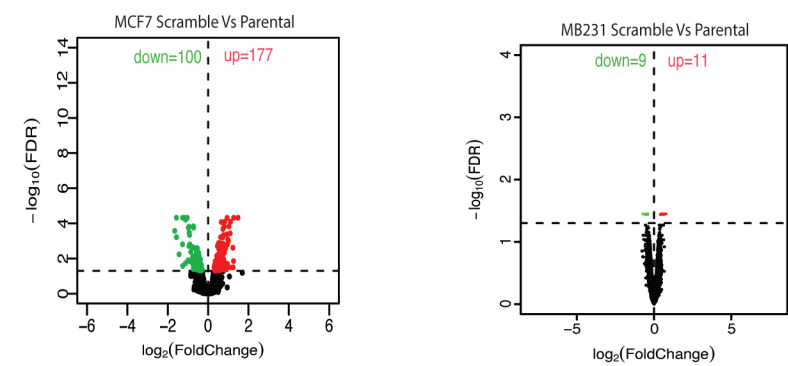

Supplement: mcr-22-0370_figure_s1_suppsf1.pdf [file mcr-22-0370_figure_s1_suppsf1.pdf]

**A**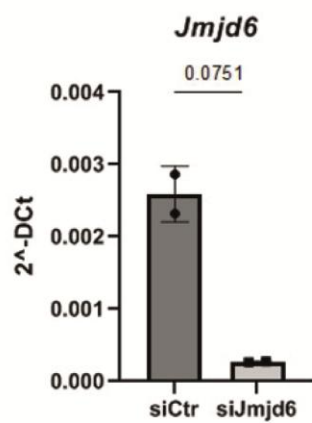**B**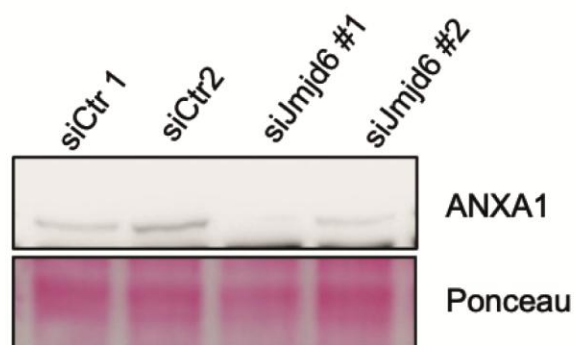**C**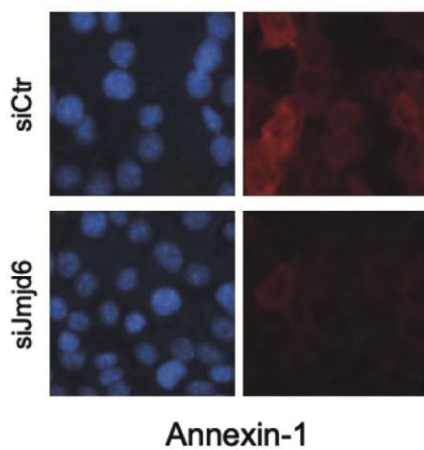**D**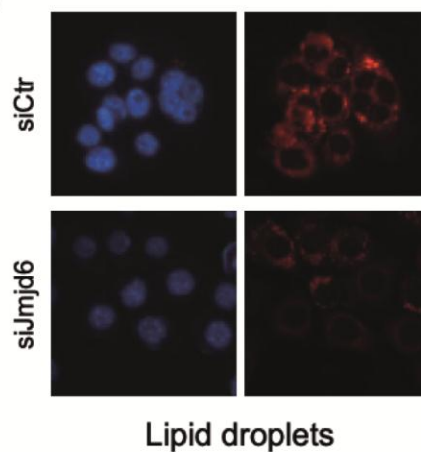

Supplement: mcr-22-0370_figure_s3_suppsf3.pdf [file mcr-22-0370_figure_s3_suppsf3.pdf]

A

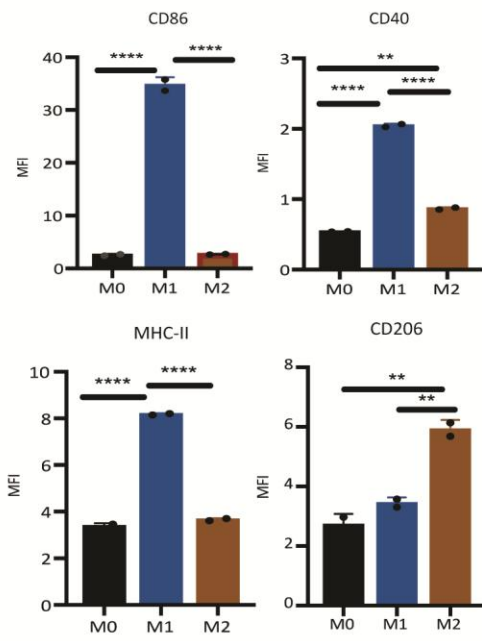

B

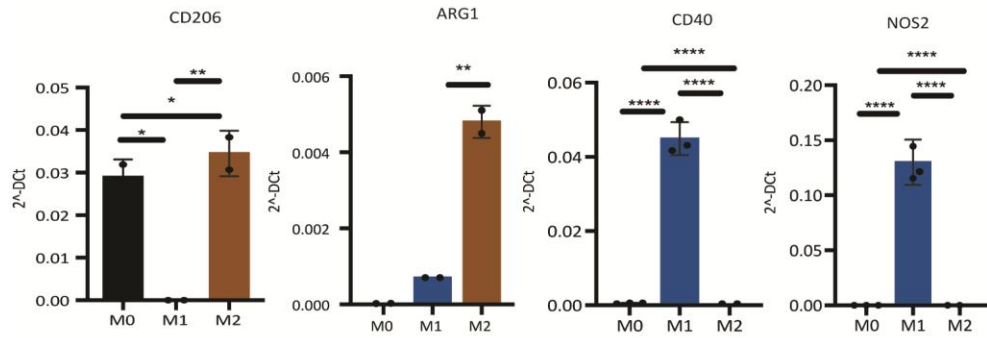

C

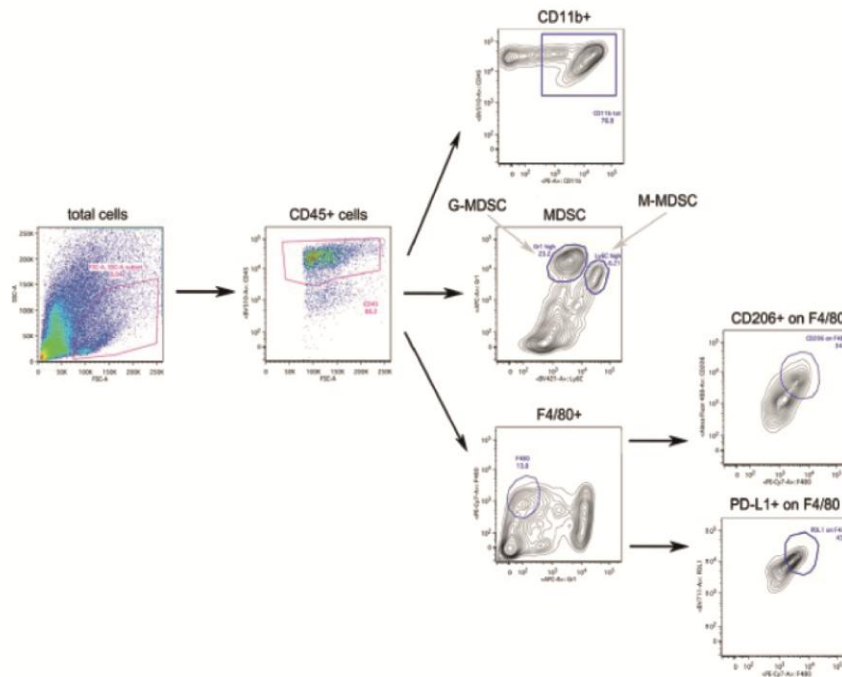

Supplement: mcr-22-0370_figure_s4_suppsf4.pdf [file mcr-22-0370_figure_s4_suppsf4.pdf]
